# Supplementary material
Source: PubMed Central journal article supplement (PMC3990913)
Supplement: supp_blood-2013-12-546077_blood-2013-12-546077-1.pdf [file supp_blood-2013-12-546077_blood-2013-12-546077-1.pdf]

**Supplemental Figure 1.** Characterization of key structural events in the deletion of 17p by JT1q12. Chromosome 1 (donor) is depicted as yellow and chromosome 17 (receptor) is blue. FISH probes shown on chromosome 1 are 1q12 (red), 1q21 (green), and on 17, TP53 (green) and ERBB2 (red). A) Triradial of 1q showing origin of extra copy of 1q (top) and normal chromosome 17 (bottom). B) The loss of 17p and gain of 1q occur as the result of a whole-arm exchange. C) The der(1;17) contains an extra copy of 1q21 and has lost one copy of 17p (TP53). Further instability (sequential translocation) can result in an additional copy of the JT1q12 to a different RC or the JT1q12 can be lost as a micronucleus. D) Minor subclones can emerge showing only deletion 17 and no evidence of JT1q12.

**Supplemental Table 1.** Shows composite G-band karyotype designations, indications of subclones identified by G-banding, and number of cells studied (inside brackets [ ]) for all 86 patients.

**Supplemental Table 2.** FISH results for all 86 patients with ploidy classification of hyperdiploidy (HRD) or non-hyperdiploidy (NHRD), IGH translocations, copy numbers for 1q12, 1q21, and 17p.

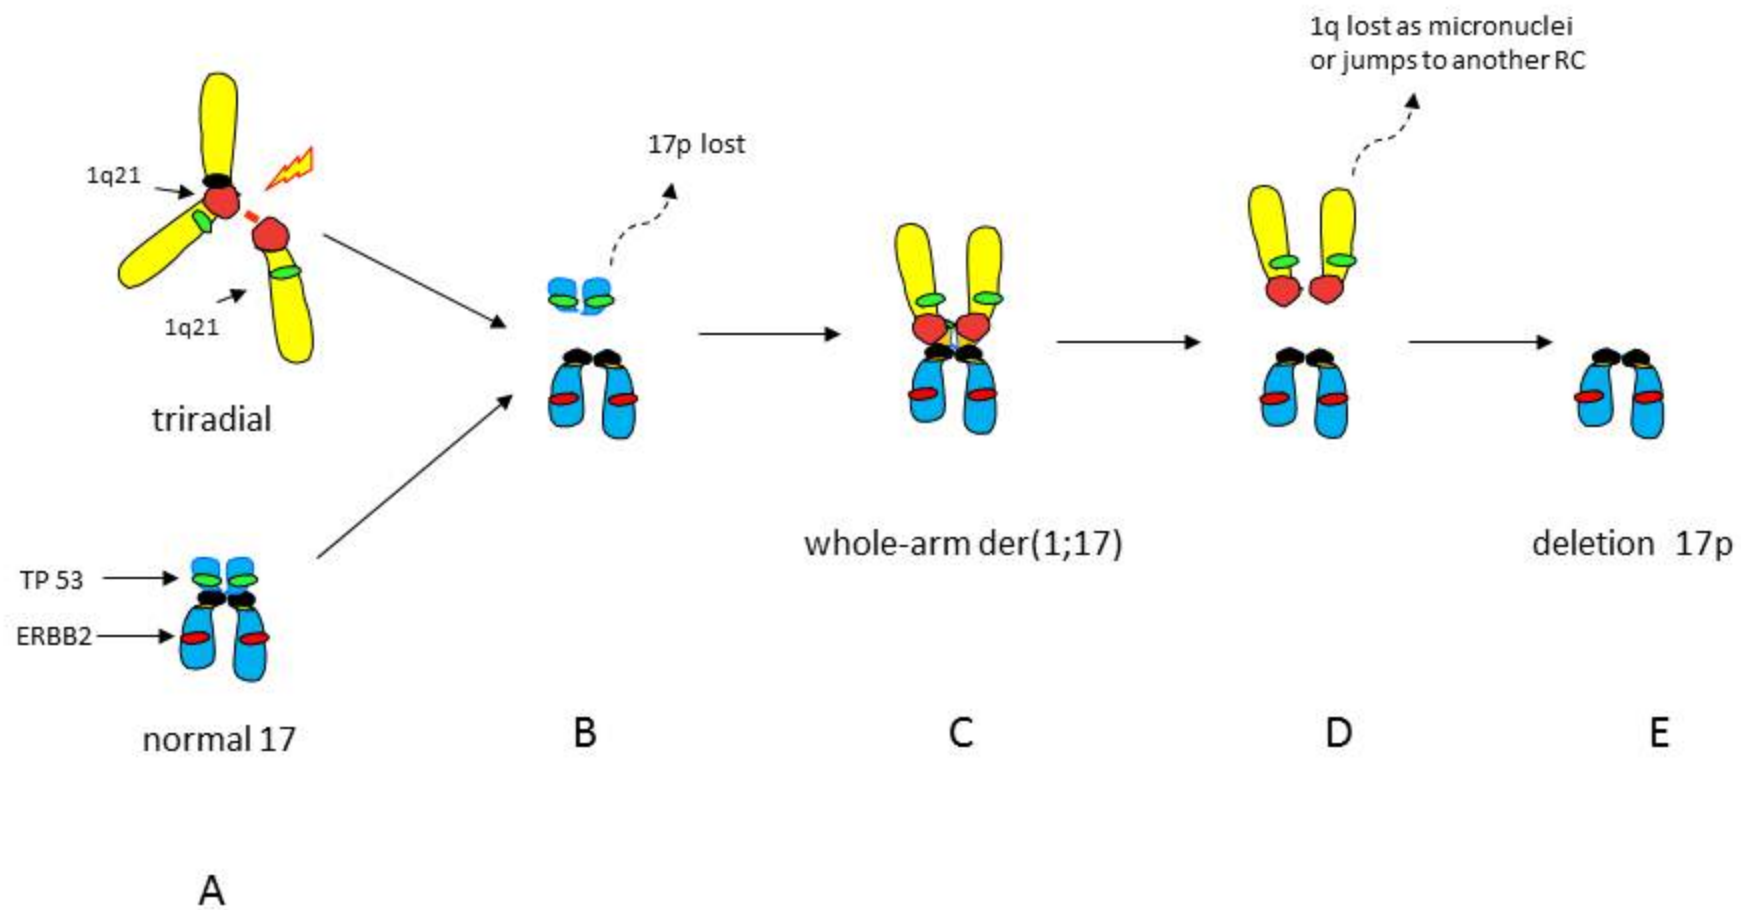

Supplemental Figure 1

Supplemental Table 1

| Pt # | Composite karyotype                                                                                                                                                                                                                                                                                                                             |
|------|-------------------------------------------------------------------------------------------------------------------------------------------------------------------------------------------------------------------------------------------------------------------------------------------------------------------------------------------------|
| 1    | 54~57,X,-X,?add(2)(q37),+3,der(3)t(1;3)(q12;q29)del(1)(q?42),+5,der(8)t(1;8)(q12;q24.3),+9,+9,+11,+15,+15,+19,add(19)(q13.3),del(20)(q11.2),+21,+21,+mar[cp6]                                                                                                                                                                                   |
| 2    | 61~62<2n>,XY,+Y,+der(1;19)(q10;p10)x2,t(1;12)(q12;q24.1),+3,+5,+7,+add(7)(p22)x2,i(8)(q10)x2,+9,+9,+10,+11,inv(11)(p15q23)x2,+12,+17,+19,+21[cp8]                                                                                                                                                                                               |
| 3    | 52~54,XY,+del(1)(p13),+der(1;19)(q10;p10),add(2)(q33),+3,+7,+9,inv(9)(p11q13),der(10)t(10;12)(q26;q13),+11,-12,-13,+15,+17,?der(17;20)(p10;q10),+19,der(19)t(8;19)(q11.2;q13.2),+21[cp20]                                                                                                                                                       |
| 4    | 49~52,XY,+1,der(1;?7)(p10;q10),der(1;15)(q10;q10),+3,-4,+5,i(6)(p10),+7,+7,+9,+9,?dic(9;15)(p22;q22),del(9)(q12),+11,der(11)dup(11)(q25q13)t(1;11)(q21;q13),der(11)t(?4;11)(q25;p15),add(12)(p13),der(14;21)(q10;q10),+15,+15,-16,add(16)(q24),add(17)(p13),add(18)(q21.1),+19,add(20)(p12),add(22)(p11.1)[cp15]                                |
| 5    | 84,XXYY,i(1)(q10)x2,t(1;8)(p13;q24.1)x2,-2,-4,-4,-8,-9,i(9)(q10),t(9;12)(p22;q24.3)x2,-13,-13,-14,-14,add(14)(q32),-16,del(16)(q22)x2,+2mar[cp20]                                                                                                                                                                                               |
| 6    | 44~46,XY,+del(1)(q?41),der(1;16)(q10;p10),i(6)(p10),dup(7)(q11.1q31.2),i(7)(q10),del(13)(q12q22),-14,del(17)(p12),add(18)(q22),-20,add(22)(q13),+mar[cp15]                                                                                                                                                                                      |
| 7    | 74~78<3n>,XXX,+1,+i(1)(q10),der(1;22)(q10;q10),+2,-4,+5,+7,+8,del(11)(p11.2p13),+13,-14,der(14)t(11;14)(q12~13.1;q32)x2,+16,+19,+20,+21[cp20]                                                                                                                                                                                                   |
| 8    | 45~49,X,add(?X)(p11.1),del(1)(p11p31),der(1)del(1)(p11p31)dup(1)(q12q25),+der(1;9)(q10;p10),+9,del(10)(q26),del(10)(q11.2),-13,+19,+mar[cp7]<br>93~101,idemx2,-add(X),der(14)t(1;14)(q?21;p11.1),inc[cp9]                                                                                                                                       |
| 9    | 41~42,X,-X,der(1;16)(q10;p10),-4,add(7)(q36),t(11;14)(q12~13.1;q32),-13,-14,der(17)add(17)(p12)t(1;17)(q12;q25)[cp17]<br>41,idem,t(X;12)(q13;q13)[2]                                                                                                                                                                                            |
| 10   | 43~45,X,-X,del(1)(p13p22),+i(1)(q10),t(7;13)(q?31.2;q?11),t(8;9)(q24.3;p21),add(10)(p15),-13,der(14)add(14)(p13)t(14;16)(q32;q24),der(16)t(14;16)[cp7]<br>78~83,idemx2[cp2]<br>41~44,X,-X,del(1)(p13p22),+i(1)(q10),t(1;4)(p22;q35),t(7;13),t(8;22)(q24.1;q11.2),-10,-13,der(14)add(14)(p13)t(14;16)(q32;q24),add(15)(q26),der(16)t(14;16)[cp9] |

|    |                                                                                                                                                                                                                                                                                                                                                                  |
|----|------------------------------------------------------------------------------------------------------------------------------------------------------------------------------------------------------------------------------------------------------------------------------------------------------------------------------------------------------------------|
| 11 | <p>50~52,-X,?t(X;6;5;21)(p11.2;p21.3;p13;q22),+der(1;5)(q10;p10),+3,+7,+9,t(10;17)(q22;p13),del(11)(p?15),?t(14;16)(q32;q24),+17,+19[cp6]</p> <p>51~52,-X,der(X)t(X;21)(p11.2;q22),+der(1;5),+3,der(5)inv(5)(p13q13)ins(5;6)(p13;p21.3p25),der(6)t(X;6)(p11.2;p21.3),+7,+9,t(10;17)(q22;p13),del(11),?t(14;16)(q32;q24),+17,+19,der(21)t(5;21)(p13;q22)[cp6]</p> |
| 12 | <p>42~43,XY,+1,del(1)(p11p31),der(1;17)(q10;q10),del(2)(q31),t(3;12)(q12;p11.2),-10,del(11)(q13q23),-12,del(13)(q12q22),del(14)(q24),-22[cp6]</p> <p>43,idem,-der(1;17),t(3;11)(q13.2;q23),-5,del(6)(q21),+del(?11)(p11.2),+del(12)(p12),-del(13),-del(14),+14,del17p11[3]</p>                                                                                   |
| 13 | <p>74~84,XXYY,+del(1)(p11p31)x2,der(1;20)(q10;q10)x2,inv(1)(p22p35)x2,-2,dic(2;6)(q11.1;q21),-3,del(5)(q22q34),der(5)t(1;5)(q12;p15.3)inv(1)(q12q21)x2,-6,del(6)(q25),add(7)(p11.1)x2,+8,der(8;15)(q10;q10)x2,der(9;12)(q10;q10)x2,-10,-13,-13,del(14)(q24)x2,-18,der(19)t(1;19)(q12;q13.1)[cp18]</p>                                                            |
| 14 | <p>45~46,X,-X,del(1)(p13),+der(1;19)(q10;p10),t(1;6)(p13;q27),-6,?8,del(12)(q23),?inv(13)(q12q22),der(14)t(?6;14)(p21.2;q32)[cp14]</p>                                                                                                                                                                                                                           |
| 15 | <p>46,X,-X,add(1)(q21),ider(1)(q10)del(1)(q42),?del(5)(p15),+7,hsr(7)(p15),der(8)t(1;8)(p13;q24.1),+9,add(9)(p12),der(10)t(1;10)(q21;p13)add(10)(q26),del(11)(q21q23),del(13)(q12q22),i(13)(q10),-14,add(15)(q26.3),der(18)t(1;18)(q12;q23),add(20)(q13.3),der(21)t(1;21)(q12;p13)ins(21;?)(p13;?),add(22)(p11.2)[cp17]</p>                                      |
| 16 | <p>73~86&lt;4n&gt;,XXYY,del(1)(q42)x2,del(1)(p11p31)x2,-2,-3,-4,-4,+5,del(5)(q15q33)x2,-7,del(9)(p13),-10,-10,-11,t(11;17)(q13;p13),-12,-13,-14,-15,-15,-16,-17,add(17)(p11.1),der(18)t(1;18)(q12;q23)x2,-21[cp19]</p>                                                                                                                                           |
| 17 | <p>48,X,-X,+der(1;16)(q10;p10),add(1)(q?42),der(1)del(1)(p11p31)del(1)(q12),add(6)(q27),+7,?t(8;22)(q24.1;q11.2)x2,del(12)(q21q23),add(?13)(q12),+18,der(18)t(1;18)(q12;q23),der(18)t(1;18)(q12;q23)dup(1)(q12q25)[cp14]</p> <p>80~83,idemx2,-der(1),-4,-5,-7,-8,-9,-9,-11,-14,-15,-16,del(16)(q22),-17,del(?20)(q11.2q13.1),+mar,inc[cp8]</p>                   |
| 18 | <p>44~46,X,-X,+1,der(1;17)(q10;q10),t(1;7)(p13;q32),del(2)(q32),add(3)(q29),?t(4;13)(q32;q14),add(6)(q27),t(9;18)(p22;q23),+11,der(11;22)(q10;q10),der(14)t(11;14)(q12~13.1;q32),der(15;22)(q10;q10),add(19)(p13.3)[cp10]</p>                                                                                                                                    |
| 19 | <p>43~44,X,-Y,i(1)(q10),?t(2;16)(q37;q24),der(6)t(1;6)(p22;p?24)add(6)(q13),del(9)(p22),-13,-14,add(17)(p11.1),i(21)(q10)[cp17]</p>                                                                                                                                                                                                                              |

|    |                                                                                                                                                                                                                                                                                                                                                                                                                                                                                                                                                                                                                                                                                           |
|----|-------------------------------------------------------------------------------------------------------------------------------------------------------------------------------------------------------------------------------------------------------------------------------------------------------------------------------------------------------------------------------------------------------------------------------------------------------------------------------------------------------------------------------------------------------------------------------------------------------------------------------------------------------------------------------------------|
| 20 | 55~59<3n>,XY,-X,der(1;1)(q10;q10)add(1)(q?44)dup(1)(q?12q?41)add(1)(q?44),t(1;10)(p13;q24),del(2)(p25),der(2;17)(p10;q10)del(2)(p25),-4,-5,-6,der(6)inv(6)(p22q27)del(6)(q21),i(8)(q10)x2,+add(9)(q34),+del(9)(q13),der(9;19)(p10;p10),-10,-12,-13,-14,der(14)t(1;14)(q12;p13)t(1;?15)(q?32;q11.1),-15,-16,del(20)(q11.2),i(20)(q10),-22[cp20]                                                                                                                                                                                                                                                                                                                                            |
| 21 | 44,XY,+1,del(1)(p13p22),der(1;16)(q10;p10),der(3)t(3;?15)(p25;q15),-4,der(8)t(8;13)(p23;q12),der(8;?19)(q10;p10),?der(9)t(1;9)(q12;p24)ins(9;?)(p24;?)del(9)(q12),del(11)(q21q23),-13,+19,-20,add(22)(q13),+mar[cp4]                                                                                                                                                                                                                                                                                                                                                                                                                                                                      |
| 22 | 56~66<3n>,XX,-Y,-1,add(1)(q42),?t(2;9)(p21;q22),der(3;18)(q10;q10),der(4)t(1;4)(p32;p15.2),hsr(5)(p13),+6,add(6)(p25),add(6)(q21),+7,der(9)t(1;9)(q12;p24),+der(9)t(1;9)(q12;p24)t(1;9)(q12;q22),-10,add(10)(q26),-13,add(13)(p11.2),-14,der(14)t(14;17)(p13;q11.1),-15,i(15)(q10),-17,+18,+19,add(20)(p12),-21,add(21)(p11.2)[cp19]                                                                                                                                                                                                                                                                                                                                                      |
| 23 | 55~56,Y,der(X)t(X;1)(q28;q12),t(1;8)(p13;q24.1),+der(1)t(1;8),+der(3)t(1;3)(q12;q29),+8,+9,+11,der(14)t(6;14)(p21.3;q32),+15,+17,+18,+19,+20[cp10]                                                                                                                                                                                                                                                                                                                                                                                                                                                                                                                                        |
| 24 | 80<4n>,XX,+X,-Y,-Y,der(X;17)(q10;q10),der(1;6)(p10;p10),der(1;16)(q10;p10),der(1;21)(q10;q10),-2,add(2)(q23),del(4)(q31.1),+add(?5)(q14),del(6)(p23),t(6;11)(p25;q13)x2,+8,add(9)(p11),-10,add(10)(q24),-11,add(12)(q15)x2,-13,-14,-14,?add(14)(q32),-15,add(15)(p13),add(16)(q?22),del(16)(q22)x2,-17,add(17)(p13),add(19)(q13.3),add(21)(p13),-22,del(22)(q13)[cp3]<br><br>78~84<4n>,XXYY,+1,+1,del(1)(q12),der(1;6)(p10;p10),der(1;16)(q10;p10)x2,der(1;17)(q10;q10),add(2)(q12)x2,+6,der(6)t(6;11)(p25;q13)add(11)(q23)del(6)(q21)x2,t(6;11)(p25;q13)x2,+8,add(9)(p11)x2,-10,-11,der(11)t(6;11)x2,-12,del(?13)(q12q22)x2,-14,-14,?add(14)(q32),-15,-15,-17,-19,-22,add(22)(q13)[cp15] |
| 25 | 78~80,-X,-X,t(X;1)(q28;p13),+1,+1,+del(1)(p13),dic(1;10)(p13;p15)x2,+add(3)(p21),+4,+6,del(6)(q13)x2,+7,add(7)(p22)x3,+8,+?del(8)(p23),+9,der(12)t(5;12)(q31;q24.3),-13,+15,del(16)(q22)x3,+18,+19,+20,+21,+22[cp16]                                                                                                                                                                                                                                                                                                                                                                                                                                                                      |
| 26 | 50,X,-X,+1,der(1;16)(q10;p10),+der(1;19)(q10;p10),t(1;8)(p11;q24.3),+4,+9,-13,?add(14)(q32),+15,+21,+21[13]                                                                                                                                                                                                                                                                                                                                                                                                                                                                                                                                                                               |
| 27 | 40,X,-X,der(1)t(1;?14)(q?32;q11.1),i(1)(q10),-4,der(4)t(1;4)(p31;q32),del(5)(q12q33),del(6)(q?25),der(8;?20)(q10;q10),+9,add(10)(p15),add(11)(q25),-12,-13,add(13)(p11.1),-14,+add(15)(q26),t(15;21)(q11.1;q22),del(16)(q22),add(18)(p11.3),add(18)(q23),der(19)t(11;19)(q12~13.1;q13.1)add(11)(q25),add(19)(q13.4),-21,-22[cp12]<br><br>41,idem,-der(1),+ider(1)(q10)del(1)(q25)add(1)(q44),-del(5),+5,-der(8;?20),+der(11)add(11)(p15)add(11)(q25),der(14)t(11;14)(q12~13.1;q32)add(11)(q25),-add(11),add(17)(p13),-der(19),+19,+del(?20)(p11.1),+mar[cp7]                                                                                                                              |

|          |                                                                                                                                                                                                                                                                                                                                                                                                                                                                                                                                                                              |
|----------|------------------------------------------------------------------------------------------------------------------------------------------------------------------------------------------------------------------------------------------------------------------------------------------------------------------------------------------------------------------------------------------------------------------------------------------------------------------------------------------------------------------------------------------------------------------------------|
| 28       | 49,XX,?t(1;8)(p22;q22),+der(1)t(1;8)x2,del(6)(q25),t(6;14)(p21.1;q32),+7[13]                                                                                                                                                                                                                                                                                                                                                                                                                                                                                                 |
| 29       | 49~50,XX,der(3)t(1;3)(q12;p26),+7,+der(8;19)(q10;p10),i(8)(q10),+9,der(9)t(1;9)(q12;q13),-13,t(13;15)(q13;q26),+15[cp9]<br><br>50,idem,+der(15)t(13;15)[5]                                                                                                                                                                                                                                                                                                                                                                                                                   |
| 30       | 52~54,XY,der(1)t(1;8)(q21;q11.1)ins(1;?)(q21;?),add(1)(p22),der(2)t(2;8)(q37;q13),+5,+5,der(5)t(1;5)(q21;q22)x2,+7,der(7)del(7)(p12p13)t(1;7)(p?22;q36),+8,del(8)(p11.2),+9,t(9;12)(p10;p10),+11,+15,?t(16;22)(p12;q13),der(19)t(17;19)(q11.2;p13.3),+21,+22[cp16]/55~56,idem,+7,+del(8)(p11.2),+12[cp4]                                                                                                                                                                                                                                                                     |
| 31       | 43~44,XY,+1,dic(1;8)(q12;q24.3),add(3)(q27),?t(4;20)(q13;q13.3),del(5)(q33),t(6;6)(q27;p22),+7,-8,der(11;12)(q10;q10),-13,add(14)(p11.2),add(15)(p11.1),dic(16;16)(p13.3;q24),add(17)(p11.1),del(?18)(q21),del(19)(q12),add(22)(q13),+mar[cp13]                                                                                                                                                                                                                                                                                                                              |
| 2nd spec | 43~45,XY,+1,+1,der(1;7)(q12;q21),dic(1;8)(q12;q24.3),+3,add(3)(q27),-4,+6,der(6;17)(p10;q10),t(6;6)(q27;p22),+7,+7,-8,+11,der(11;12)(q10;q10),-13,add(14)(p11.2),+15,add(15)(p11.1),dic(16;16)(p13.3;q24),-18,del(19)(q12),add(20)(q13.3),add(22)(q13),+mar[cp17]                                                                                                                                                                                                                                                                                                            |
| 32       | 46,X,-X,add(1)(q42),add(1)(p22),der(2)t(2;13)(p24;q12),+3,del(3)(p12p21),add(4)(p11),del(5)(p13),+6,add(6)(q12),add(9)(q32),+11,der(12)add(12)(p13) add(12)(q24.3),der(12) add(12)(p11.2)?dup(12)(q22q24.3)add(12)(q24.3),-13,-13,+15,del(17)(p11.2),+19,add(19)(p13.1),add(19)(p13.2)[cp11]<br><br>46~47,idem,add(15)(p13),-add(19)(p13.1)[cp3]<br><br>48~49,idem,+X,-add(1)(p22),+der(1)t(1;1)(p36.3;q12),-der(2)t(2;13),+2,add(3)(q27),del(7)(q32),-add(9),+del(9)(q12),-der(12),-der(12),+12,+add(12)(p13)t(12;13)(q24.1;q12),+del(?13)(q12q22),-14,-add(19)(p13.1)[cp5] |
| 33       | 46,X,-Y,+1,add(1)(p?13),der(1;16)(q10;p10),+3,add(3)(p12),del(3)(p12),?t(5;15)(q35;q24),der(6)t(1;6)(p?31;q?15),del(13)(q12q22),-14,+19[12]                                                                                                                                                                                                                                                                                                                                                                                                                                  |
| 34       | 53,XX,+3,+5,+7,?inv(8)(p21q24.1),del(?9)(p22),+11,del(?14)(q24),der(18)t(1;18)(q12;q23),+19,+20,inc[2]                                                                                                                                                                                                                                                                                                                                                                                                                                                                       |
| 2nd spec | 52,X,-X,+3,+4,t(4;9)(q21;q34),+6,+7,+9,-13,+15,+17,der(17)t(1;17)(q12;p?11.2),der(18)t(1;18)(q12;q23),+19,?i(20)(q10)[cp3]                                                                                                                                                                                                                                                                                                                                                                                                                                                   |

|          |                                                                                                                                                                                                                                                                                                                                                                                                                                                                                            |
|----------|--------------------------------------------------------------------------------------------------------------------------------------------------------------------------------------------------------------------------------------------------------------------------------------------------------------------------------------------------------------------------------------------------------------------------------------------------------------------------------------------|
| 35       | 72~86,XX,-Y,-Y,+1,+1,add(1)(p13)x2,del(1)(p11p22),der(1)del(1)(p11p22)del(1)(q11),der(1)t(1;1)(p32;q12),-3,del(6)(q15)x2,-9,-10,-10,add(11)(p15)x2,-13,-13,-14,-14,+add(16)(q24),+16,der(16)t(1;16)dup(1)(q12q21),del(17)(p11.2),-18,der(18)t(1;18)(q12;q23),-22[cp16]                                                                                                                                                                                                                     |
| 36       | 42~43,XX,der(6)t(6;12)(q21;q13),-10,del(11)(q23),-12,-13,der(17)t(1;17)(q12;p11.2),der(18)t(1;18)(q12;p11.3)[cp2]                                                                                                                                                                                                                                                                                                                                                                          |
| 2nd spec | 42~45,X,-X,t(1;2)(p22;q23),del(3)(p14p14),der(6)t(6;12)(q21;q13),idic(7)(p22),t(8;13)(q24.1;q12),del(11)(q23),-12,-13,del(16)(q22),der(18)t(1;18)(q12;p11.3)dup(1)(q12q44)[cp16]<br>83~86,idemx2,add(4)(p14),der(5)t(5;9)(p15.1;q13),-9,add(9)(p12),-der(18),+18,+18,add(18)(p11.2),der(18)t(1;18)dup(1)del(18)(q21.1)[cp4]                                                                                                                                                                |
| 37       | 54~55,XX,dup(1)(q12q25),+3,del(4)(q31.3),+7,der(8)?t(8;19)(p21;q13.4),+9,+9,-10,+11,+del(11)(q13),del(16)(q21),+18,+19,der(19)add(19)(p12)?t(8;19),+21,+mar[cp20]                                                                                                                                                                                                                                                                                                                          |
| 38       | 41~42,Y,der(X)t(X;1)(p22.3;q12),del(1)(p11p22),t(1;3)(p13;p25),-2,del(2)(q?33),-4,der(5)t(1;5)(q12;q35),t(6;22)(p12;p11.2),del(12)(p12p12),-13,add(17)(p11.2),-20[cp8]<br>39~42,idem,-del(1),+der(1)del(1)(p11p22)t(1;11)(q?44;q12)ins(1;?)(q?21;?),ins(?11;?)(q12;?)[cp5]                                                                                                                                                                                                                 |
| 39       | 82~92,XXY,-Y,-1,-1,der(1)add(1)(p36.1)add(1)(q42),-2,-2,del(3)(q21)x2,-4,-4,add(5)(q15),der(5)t(1;5)(q12;q15),add(6)(q21)x2,+7,+7,+7,add(7)(p22),add(7)(q36),der(7)t(1;7)(q12;q32)x3,+8,der(8)t(1;8)(q12;q22)x2,+9,+9,add(9)(p24),der(9)t(1;9)(q12;q34),der(10)t(1;10)(q12;q26),add(11)(p15)x2,-12,-13,del(?13)(q12q22)x3,-14,der(14)t(1;14)(p11;q32)x3,-15,-15,add(15)(p11.1),add(16)(q24),-17,add(17)(p11.2)x2,+19,+19,-20,+21,add(21)(p11.1),+22,add(22)(q13),inc[cp19]/91,XXYY,-?17[1] |
| 40       | 38~42,XY,dup(1)(q12q31),add(3)(q29),del(3)(q25),del(5)(q31q33),del(6)(q23q25),del(8)(p11.2),del(11)(p13),-13,-14,add(?14)(q24),der(15)t(15;21)(p11.2;q11.1),del(16)(q11.2),-17,der(19)t(1;19)(q12;q13.4) dup(1)(q12q31)[cp7]/ 42,XY,del(6)(q23q25),der(8)del(8)(p11.2)t(1;8)(q12;q24.3),add(9)(q13),del(11)(p13),-13,add(13)(q32),-14,add(?14)(q24),del(15)(q15),del(16)(q11.2),-17,add(19)(q13.4)[7]                                                                                      |
| 41       | 46,X,-X,add(2)(q22),t(2;12)(q37;q24.1),der(4)t(1;4)(q12;p16),del(6)(q23),+11,der(12)t(1;12)(q12;q24.3),der(13)t(2;13)(q22;p11.2),+15,add(15)(q26.3),-16[9]                                                                                                                                                                                                                                                                                                                                 |
| 42       | 51~54,XY,+1,+1,der(1;8)(q10;q10)x2,+3,+5,?t(6;11)(p22;p12),+7,+der(8)t(?1;8)(p32;p23),+9,add(10)(q26),+11,add(14)(p11.1),+15,-16,add(16)(q24),der(17;19)(q10;p10),+19,+21[cp8]<br>51~54,idem,der(1)?inv(1)(p11q21)del(1)(q21)[cp11]                                                                                                                                                                                                                                                        |

|    |                                                                                                                                                                                                                                                                                                                                                                                                                                   |
|----|-----------------------------------------------------------------------------------------------------------------------------------------------------------------------------------------------------------------------------------------------------------------------------------------------------------------------------------------------------------------------------------------------------------------------------------|
| 43 | 42~43,X,-X,+1,der(1;16)(q10;p10),?t(1;6;19)(p13;p21.3;p13.3),t(5;12)(q31;q22),-6,der(10)t(?3;10)(q22;q24),-13,der(15)t(?6;15)(q11;p11.2),add(16)(q?24),i(21)(q10),-22,+mar[cp13]<br>84,idemx2[1]                                                                                                                                                                                                                                  |
| 44 | 45~46,XY,del(1)(p11p31),del(13)(q12q21),t(14;16)(q32;q23),der(20)t(1;20)(q21;p13)[cp20]                                                                                                                                                                                                                                                                                                                                           |
| 45 | 48,X,-X,+6,der(6)t(1;6)(q21;q25)x2,+7,-13,+15,+19[3]                                                                                                                                                                                                                                                                                                                                                                              |
| 46 | 47~49,XY,del(1)(p11p22),+3,add(3)(q29),del(4)(q27),+5,del(6)(q23),+7,del(7)(q11.2q21.2),add(8)(p22),-13,add(?14)(q22),del(17)(p13),del(20)(p11.1),-21,add(21)(q22),der(22)t(11;22)(q13;q11.2),+mar[cp3]<br>46~47,idem,-5,-del(6),+dic(5;6)(q?14;q?27)[cp19]                                                                                                                                                                       |
| 47 | 52~53,XX,der(1)del(1)(p11p32)del(1)(q42),+der(1;19)(q10;p10)x2,der(2)t(1;2)(q12;q37)del(1)(q42),add(4)(q35),del(4)(q12q21),+6,del(6)(q25),+7,der(7)t(1;7)(q12;q31)del(1)(q42),add(8)(q24.1),t(8;22)(q24.1;q13),+9,del(13)(q12q22),der(14)t(11;14)(q12~13.1;q32),+15,+21[cp20]                                                                                                                                                     |
| 48 | 59~81<4n>,X,-X,-Y,-Y,ider(1)(q10)del(1)(q42)x2,t(1;2)(p32;p21),der(1)t(1;2),-2,-4,-5,?t(5;10)(p14;q25)x2,der(6)t(1;6)(q?21;q?11)t(1;1)(q?32;p?22)x2,add(7)(p22),der(8)t(8;8)(p23;q11.2)x4,-9,del(9)(q12q22),-12,-13,-13,-14,-14,-16,i(21)(q10),-22,+mar1,+mar2[cp16]                                                                                                                                                              |
| 49 | 44~45,X,-Y,dup(1)(q12q44),?del(3)(q27),del(7)(p11.2),+8,?del(11)(p15),-13[cp3]                                                                                                                                                                                                                                                                                                                                                    |
| 50 | 40~42,X,del(X)(q26),add(1)(q21),der(1)del(1)(p13p31)dup(1)(q12q21)t(1;3)(q21;q11.1),+der(1;19)(q10;p10),-2,-3,-8,del(8)(q24.1),der(9)t(7;9)(q11.2;q34),t(10;10)(q26;q24),del(11)(p13),der(11)t(7;11)(q11.2;p15)ins(11;?)(p15;?),der(?13;15)(q10;q10)t(?8;13)(q24.1;q34),der(?13;15)del(15)(q22)t(?8;13),-14,-16,der(16)t(1;16)(q12;q24)dup(1)(q12q?31),add(17)(p11.2),add(18)(q23),der(?20)t(1;20)(q12;q11.2)dup(1)(q12q?31)[cp9] |
| 51 | 47,X,-X,dup(1)(q12q31),del(1)(p11p?34.1),add(2)(p?21),+3,?del(4)(q31.1q33),+7,add(8)(p23),t(8;22)(q24.1;q11.2),-13,+15,-16,add(20)(q13.3),+21[cp11]<br>47,idem,-dup(1),+1,der(1;15)(q10;q10)[3]                                                                                                                                                                                                                                   |
| 52 | 45,XX,dup(1)(q21q25),del(2)(q?33),?del(6)(q25),der(8)t(1;8)(q12;q24.1),?del(10)(q25),-13,del(14)(q24),+15,-22[1]                                                                                                                                                                                                                                                                                                                  |



|          |                                                                                                                                                                                                                                                                                                                                                                                                                                                                                                                                                |
|----------|------------------------------------------------------------------------------------------------------------------------------------------------------------------------------------------------------------------------------------------------------------------------------------------------------------------------------------------------------------------------------------------------------------------------------------------------------------------------------------------------------------------------------------------------|
| 53       | <p>45,X,-Y,del(1)(p21p22),del(1)(q21),+i(1)(q10)x2,inv(9)(p11q13)c,-10,-13,-14,+mar[cp13]</p> <p>83,idemx2,-2,-7,-8,-9,-12,-20,-mar[1]</p> <p>45,idem,-i(1),+der(1)i(1)(q10)del(1)(q41)[cp3]</p> <p>87,idemx2,-i(1)x2,+der(1)i(1)(q10)del(1)(q41)x2,-8,-9,-9[1]</p> <p>45,idem,-del(1)(p21p22),+der(1)t(1;4)(p?13;q12),der(4)t(1;4)(p?13;q12)[cp2]</p>                                                                                                                                                                                         |
| 54       | <p>39~45,XX,der(1;21)(p10;q10),+r(?1)(p13q?31),der(2)t(1;2)(q12;q37),add(3)(q29),der(4;18)(p10;q10),add(5)(q34),+7,add(10)(q26),add(12)(p12),-13,add(15)(p11.2),der(15)t(?14;15)(q31;q24),add(17)(q25),der(19)t(?7;19)(p13;q13.1),add(20)(p12),der(21)t(1;21)(q?31;p13)[cp17]</p>                                                                                                                                                                                                                                                              |
| 55       | <p>53~56,X,-Y,t(1;8)(p13;q24.3),+i(5)(p10),+der(7)t(1;7)(q12;p21)add(1)(q?25),+9,+11,+15,+del(17)(p12),+18,+19,+20,+21,+mar[cp9]</p> <p>53~56,idem,-der(7)t(1;7),+del(7)(p12),del(12)(q13),+del(17)(q?22q?24),der(19)t(3;?;19)(p11;?;p13.3),der(19)t(12;?;19)(q11;?;p13.3)[cp11]</p>                                                                                                                                                                                                                                                           |
| 56       | <p>48~49,XY,der(1;1)(p11;p22)dup(1)(q12q23),der(2)t(1;2)(q12;q37),+3,+7,-13,add(14)(q32),+15,-16,+21,+mar[cp14]</p> <p>49,idem,-der(1;1),+der(1;16)(q10;q10)[2]</p> <p>96~100,idem,-der(1;1)x2,+der(1;16)(q10;q10)x2[cp2]</p>                                                                                                                                                                                                                                                                                                                  |
| 57       | <p>43~47,XY,+1,der(1;8)(q10;q10),t(1;8)(p11;q24.3),?del(2)(q?33),der(3)t(3;?8)(q?25;q?13),del(4)(q?32),-10,del(13)(q12q22),-16,add(16)(p13.1),del(17)(p12),der(19)t(1;19)(q12;p13.3)[cp3]</p> <p>44~45,idem,der(1)del(1)(p11p22)t(1;15)(q21;q22),-der(3),+3,del(6)(q21),der(15)t(1;15)(q21;q22),-der(19),+ider(19)t(1;19)(q12;p13.3)[cp3]</p> <p>100,idemx2,+X,-t(1;8),+der(1)t(1;8)add(8)(q24.3)x2,der(1)del(1)t(1;15),-der(3),+3,del(6)(q21),+6,+6,+8,+der(8)t(1;8)x2,+9,+12,-14,der(15)t(1;15),+17,-der(19),+19,+19,+ider(19)+21,+21[1]</p> |
| 58       | <p>50~52,X,-X,+3,+9,der(9)t(1;9)(q12;q?21),+11,+15,+15,+19,+21[cp15]</p>                                                                                                                                                                                                                                                                                                                                                                                                                                                                       |
| 59       | <p>79~80&lt;4n&gt;,XX,-X,-X,+1,del(1)(p12p31),der(1;11)(q10;q10)dup(1)(q12q?41),der(1;11)(q10;q10)dup(1)(q12q21),der(1;16)(q10;p10)dup(1)(q12q?41),der(2;16)(q10;q10),-3,-5,del(5)(q15q31),del(6)(q22)x2,der(7)t(7;9)(q36;q12)x2,+8,add(8)(p11.1)x3,i(10)(p10),-12,-12,der(12;22)(q10;q10),-13,-13,-14,-14,der(18)t(1;18)(q12;p11.3)x2[cp16]</p>                                                                                                                                                                                               |
| 2nd spec | <p>67~80&lt;4n&gt;,XX,-X,-X,+1,add(1)(q?31),del(1)(p12p31),der(1;11)(q10;q10)dup(1)(q12q?41),der(1;11)(q10;q10)dup(1)(q12q21),der(1;16)(q10;p10)dup(1)(q12q?41),der(2;16)(q10;q10),-3,-4,-5,del(5)(q15q31),del(6)(q22)x2,der(7)t(7;9)(q36;q12)x2,+8,add(8)(p11.1)x3,+9,del(9)(q22),-10,t(11;15)(p10;p10),-12,-12,-13,-13,-14,-14,-15,der(18)t(1;18)(q12;p11.3)x2,der(22)t(8;22)(q13;q13)[cp14]</p>                                                                                                                                             |

|    |                                                                                                                                                                                                                                                                                                                                                                                                         |
|----|---------------------------------------------------------------------------------------------------------------------------------------------------------------------------------------------------------------------------------------------------------------------------------------------------------------------------------------------------------------------------------------------------------|
| 60 | <p>42~47,X,der(Y)t(Y;1)(q12;q12),del(1)(p12p22),der(1)t(1;1)(p36.3;q12)dup(1)(q12q44),t(4;5)(p16;p13),t(8;22)(q24.1;q11.2),+12,del(12)(q14),-13,-14[cp15]</p> <p>53~63,idem,-der(1),+1,add(2)(q37),+3,+5,+6,+7,+t(8;22),+9,+11,-14,+16,+20,inc[cp3]</p>                                                                                                                                                 |
| 61 | <p>44~45,XY,+1,+del(1)(p11p22),der(1;13)(q10;q10),der(1;15)(q10;q10),del(2)(q35),del(3)(p12),del(4)(q28q31.3),add(5)(p15.3),del(6)(q21),+7,i(8)(q10),-10,inv(11)(q21q25),del(13)(q12q22),-14,add(19)(q13.4),add(20)(p11.2)x2,der(22)t(3;22)(p13;p11.1)[cp19]</p>                                                                                                                                        |
| 62 | <p>76~78,XX,-Y,add(1)(q42),der(1;6)(p10;p10),der(1;19)t(1;19)(p?31;p13.3),ins(1)(p?31;?),+der(1;?22)(q10;q10),-2,+3,der(3;14)(q10;q10),add(6)(p?23)x2,del(7)(p15)x2,der(7;14)(p10;q10),+i(7)(p10),der(9)t(7;9)(q11.2;p24)x2,add(10)(p?12)x2,+11,+12,-13,der(14)add(14)(p11.1)add(14)(q32),t(14;16)(q32;q24),+15,add(16)(p?12),del(16)(q11.2),+17,add(17)(p13)x2,add(19)(p13.3),+20,+20,+22,+mar[17]</p> |
| 63 | <p>51~54,XY,+1,der(1;16)(q10;p10),+3,t(4;18)(p14;p11.2),del(6)(q25),del(6)(q23),+del(6)(q11),+7,+9,add(11)(q23),-13,+15,+18,der(20)t(1;20)(q12;q13.3),+mar[cp19]</p>                                                                                                                                                                                                                                    |
| 64 | <p>44~45,X,-X,+der(1;17)(p10;q10)del(1)(p36.1),der(1;7)(q10;q10)dup(1)(q12q21),dup(1)(q12q21),der(4)t(1;4)(q12;q35)dup(1)(q12q21),+del(6)(q25),-13,del(20)(q11.2q13.1),der(21)t(7;21)(q11;q22)[cp19]</p>                                                                                                                                                                                                |
| 65 | <p>42~44,XX,+X,del(1)(p13),-4,-5,add(6)(q23),del(6)(p23),add(8)(p23),del(8)(q24.1),t(9;22)(q12;p11.2),der(10)t(10;11)(p11.2;q13),inv(12)(p11.2q13),add(14)(q32),der(14)t(5;14)(q13;q32),-17,der(17)t(1;17)(q12;p13),+19,add(19)(q13.4),add(20)(p13),der(21)t(1;21)(p22;p11.2),+mar[cp20]</p> <p>43,idem,der(3;9)(p10;p10),+9,t(10;11)(q24;p15),der(12;16)(q10;p10)[cp3]</p>                             |
| 66 | <p>44~45,XY,der(1)del(1)(p13)dup(1)(q12q?42),i(1)(q10),?t(1;2)(p21;p23),?add(3)(p21),add(4)(q35),del(6)(q21),der(6)t(1;6)(q21;q21),add(7)(q?32),-8,?t(8;20)(p21;p13),del(12)(p12p12),-13,der(14)t(1;14)(p31;q32),?add(17)(q25),+?18,?add(22)(q11.2)[cp17]</p>                                                                                                                                           |
| 67 | <p>42,X,-Y,i(1)(q10),t(1;8)(p13;q24.1),add(2)(p?25),del(3)(p13p22),-4,t(5;14)(q11.2;q32),del(6)(q25),del(8)(p12),-10,-14,?del(18)(p11.2)[cp16]</p>                                                                                                                                                                                                                                                      |
| 68 | <p>81~89,XXY,-Y,+1,add(1)(p13)x2,der(1)inv trp(1)(q25q12)del(1)(q32),t(1;17)(p13;q21)x2,-2,-2,+add(?4)(q21),add(5)(q35),del(?6)(q23)x2,-7,del(7)(q22)x2,del(9)(q13q22),-10,-10,del(11)(q23),-12,-13,-13,-14,add(14)(q32),+15,add(15)(p11),add(18)(q23),i(18)(q10),+19,+20,add(20)(q13.3)x3,-21,-22,inc[cp20]</p>                                                                                        |

|    |                                                                                                                                                                                                                                                                                                                   |
|----|-------------------------------------------------------------------------------------------------------------------------------------------------------------------------------------------------------------------------------------------------------------------------------------------------------------------|
| 69 | <p>43~45,XX,del(1)(p12),del(1)(p13p32),?dup(3)(q21q27),+8,der(8)t(8;11)(p12;q13)x2,-11,-13,-14,der(17)t(1;17)(q12;p11.2)[16]</p> <p>43~45,idem,XX,del(1)(p12),del(1)(p13p32),?dup(3)(q21q27),+8,der(8)t(8;11)(p12;q13)x2,-11,-13,-14,del(17)[4]</p>                                                               |
| 70 | <p>42,X,-X,del(1)(p11p22),add(2)(q11.1),der(2)t(1;2)(q12;q37)?dup(1)(q12q21),add(6)(q15),-10,del(11)(q14q21),?t(12;20)(p12;q13.3),-13,-14,+15,der(15;16)(q10;p10),-17,-20,+22,+der(?)t(?;10)(?;q11.1)[cp2]</p> <p>42,idem,?r(15)(p11.1q?24)[cp8]</p>                                                              |
| 71 | <p>50,XX,+3,der(6)t(6;8)(p21.1;q24.1),+7,der(8)t(6;8)(p12;p?23)t(6;8)(p21.1;q24.1),+9,add(11)(q24.3),-13,+15,der(16)t(1;16)(q12;q24),del(17)(p?13),der(18)t(1;18)(q12;q23),+19,del(19)(q13.1)[cp20]</p>                                                                                                           |
| 72 | <p>59~61,XX,del(X)(p11.2),der(1)i(1)(q10)add(1)(q?41)t(1;3)(q?41;p21),-2,der(2)t(1;2)(q12;q37),del(3)(p21),-4,-4,-6,del(6)(q25),+?8,inv(9)(p11q13)x2,-10,?t(10;13)(q24;p13),?inv(12)(p11.2q14),del(13)(q12q22),-14,+15,-16,-17,-20,+21,-22,-22[cp9]</p>                                                           |
| 73 | <p>48,X,-X,del(1)(p13p31),der(2)t(1;2)(q12;q37),add(3)(p21),del(3)(p21),del(4)(q21),?t(5;6)(p13;q27),+7,del(7)(p12p13),+?10,del(10)(q24),add(11)(q25),add(12)(p13),-13,del(14)(q24),add(16)(q13),?del(17)(p13),+der(?18)t(3;18)(q11.1;p11.3),+19,?add(19)(q11),add(19)(q13.3),add(21)(p13),del(22)(q12)[cp20]</p> |
| 74 | <p>45~50,X,-X,dup(1)(q12q31),+der(1;19)(q10;p10)dup(1)(q12q31),del(2)(q?35),-4,+5,del(5)(q14),inv(6)(p23q15),+7,der(7)t(7;8)(p22;q11.2),-13,+15,add(16)(q?22),+21[cp20]</p>                                                                                                                                       |
| 75 | <p>46,XX,+1,der(1;16)(q10;p10)add(1)(q?42),t(1;9)(q42;p24),add(2)(q37),+7,der(12)t(1;12)(q12;p12)add(1)(q?42),-13,der(18)t(1;18)(q12;q21)add(1)(q?42)[1]</p> <p>45~47,idem,der(6)t(6;7)(p25;q22)del(6)(q25),der(7)t(6;7)[cp19]</p>                                                                                |
| 76 | <p>55~57,XY,dup(1)(q12q25),+3,+5,+7,+7,+8,+8,der(10)t(1;10)(q12;q26),+11,add(14)(q?24.1),+15,add(15)(q26.1),+17,+18,+20,add(22)(q11.2)[cp20]</p>                                                                                                                                                                  |
| 77 | <p>41~43,X,-Y,+1,der(1;17)(q10;q10),t(3;3)(q12;q29),del(4)(p15),add(6)(q27),-13,-14,-16,add(16)(q24),add(19)(q13.4),+22[cp12]</p>                                                                                                                                                                                 |

|    |                                                                                                                                                                                                                                                                                                                                                                                                                                                                                                  |
|----|--------------------------------------------------------------------------------------------------------------------------------------------------------------------------------------------------------------------------------------------------------------------------------------------------------------------------------------------------------------------------------------------------------------------------------------------------------------------------------------------------|
| 78 | 42~46,X,-X,der(1;14)(q10;q10)dup(1)(q12q25),+7,+8,add(8)(p23)x2,del(9)(p22),+11,der(11)t(11;15)(q?13;q?11.1),dic(11;15)(q23;p11.1),-13,-16,+17,der(22)t(1;22)(p11;q13)ins(22;?)(q13;?) [cp18]                                                                                                                                                                                                                                                                                                    |
| 79 | 47,X,-Y,+1,del(1)(p11p31),der(1;6)(q10;p10),?t(7;14)(p13;q32),del(8)(p21),+9,del(9)(p22),?t(9;16)(q13;q?22),add(13)(q34),del(13)(q12q14),del(14)(q24),del(16)(q22),+21,der(22)t(1;22)(q12;q13) [cp15]<br>47,idem,t(3;11)(q21;q23)[3]                                                                                                                                                                                                                                                             |
| 80 | 46,XY,del(11)(q21q23) [cp2]<br>45~46,idem,+1,der(1;6)(q10;p10),t(1;9)(p36.3;p11),add(3)(q11.1),t(5;20)(q14;q12),+9,del(9)(p22),?inv(11)(q13q21),add(12)(p13),-13,der(14)t(11;14)(q12~13.1;q32)x2,del(16)(q12.1),del(18)(q12),del(20)(q11.2) [cp17]                                                                                                                                                                                                                                               |
| 81 | 55~57,X,-Y,+1,der(1)del(1)(p36.1)?ins(1;?)(q21;?)x2,+3,+3,+5,+6,der(?6)t(1;6)(p13;p25)del(6)(q25),+7,del(7)(p21),-8,+9,?t(10;11)(p13;p15),+11,der(12)t(1;12)(q12;q13),+15,+17,+19,+21,+21 [cp12]                                                                                                                                                                                                                                                                                                 |
| 82 | 81,XX,-Y,-Y,+1,+1,+del(1)(p13p32)x2,t(1;8)(p13;q24.1)x2,der(1;16)(q10;p10)x2,der(1;22)(q10;q10)x2,-2,-4,-10,-10,add(10)(q26),-13,-13,-14,-14,-17,?del(19)(q13.3)x2,add(20)(p13)x2 [cp4]<br>74~75,idem,der(1;15)(q10;q10)x2,-der(1;16),-der(1;22)x2,-3,-4,-5,-9,-12,-add(20),+22,+22 [cp14]                                                                                                                                                                                                       |
| 83 | 70~79,XX,-X,-1,add(1)(p22),ins(1;?)(p34;?)+2,del(2)(q13)x2,+der(3)t(1;3)(p22;q25),-4,der(5)t(1;5)(q12;p15.3)add(1)(q32),ider(5)(p10)t(1;5)(q12;p15.3)add(1)(q32),+6,+7,+add(7)(q36),add(8)(q24.1),-10,?del(11)(p11.2p13),del(11)(q12),+12,t(12;14)(q13;q32),add(?13)(q21),-14,add(15)(p11.1),add(15)(q26),+16,+16,der(16)t(16;18)(p13.3;q11.2)del(16)(q24)x3,der(16)t(16;18)(p13.3;q11.2)del(16)(q22),del(17)(p13),-18,add(18)(q21),del(18)(q21),+19,+20,der(21)t(7;21)(q11.2;p11.1),+mar [cp20] |
| 84 | 44~45,X,-Y,der(1)inv dup(1)(q32q21)add(1)(q?44),add(6)(q21),der(8)add(8)(p11.1)inv dup(8)(q24.3q11.1),add(9)(p22),ins(9;?)(q13;?),del(?10)(p11.2),t(12;15)(p13;q15),-13,+del(19)(q?13.1), add(20)(p11.1) [cp8]<br>86~89,idemx2 [cp12]                                                                                                                                                                                                                                                            |
| 85 | 61~65,XY,-X,t(1;8)(p13;q24.1),del(1)(p13),+del(1),der(4)t(1;4)(q12;q35),der(6)t(1;6)(q;q21),-10,add(12)(p13),-13,-14,-22 [cp20]                                                                                                                                                                                                                                                                                                                                                                  |
| 86 | 55~57,XY,+3,der(3)t(1;3)(q12;q24)x2,+4,+7,+9,+11,del(11)(q23),?inv(11)(p13q21),+15,+17,+18,+der(19)t(1;19)(q12;p13.3),+21 [cp5]<br>58,XY,+der(1;17)(q10;q10),+3,der(3)t(1;3)(q21;p25),+4,+7,+9,+11,+15,+18,+19,der(19)t(1;19)(q12;p13.3),+21,+21,+22 [2]                                                                                                                                                                                                                                         |
|    |                                                                                                                                                                                                                                                                                                                                                                                                                                                                                                  |

|  |  |
|--|--|
|  |  |
|--|--|

Supplemental Table 2

| Pt # | Ploidy | IGH trans         | CN 1q12 | CN 1q21 | CN 17p |
|------|--------|-------------------|---------|---------|--------|
| 1    | NHRD   | normal            | 3       | 3       | 1      |
| 2    | HRD    | normal            | 4       | 4       | 2      |
| 3    | HRD    | normal            | 4       | 4       | 2      |
| 4    | HRD    | normal            | 2       | 3       | 1      |
| 5    | HRD    | t(14;16)          | 6       | 6       | 2      |
| 6    | NHRD   | t(3;14)           | 3       | 3       | 2      |
| 7    | HRD    | t(11;14)          | 6-7     | 8       | 2      |
| 8    | HRD    | normal            | 3       | 3       | 1      |
| 9    | NHRD   | t(11;14)          | 3       | 3       | 1      |
| 10   | NHRD   | t(14;16)          | 4       | 4       | 2      |
| 11   | HRD    | deleted           | 3       | 3       | 1      |
| 12   | NHRD   | t(4;14)           | 3-4     | 3-4     | 1      |
| 13   | HRD    | t(4;14)           | 9       | 9       | 1      |
| 14   | NHRD   | ?6;14             | 3       | 3       | 2      |
| 15   | NHRD   | t(1;14)           | 6       | 6       | 2      |
| 16   | HRD    | normal            | 6       | 6       | 1      |
| 17   | HRD    | normal            | 5       | 4       | 1      |
| 18   | NHRD   | t(11;14)          | 3       | 3       | 1      |
| 19   | NHRD   | normal            | 3       | 4       | 1      |
| 20   | HRD    | normal            | 5       | 5       | 2      |
| 21   | NHRD   | normal            | 4       | 4       | 2      |
| 22   | HRD    | del(14q32)        | 5       | 5       | 2      |
| 23   | HRD    | t(6;14)           | 5       | 5       | 3      |
| 24   | HRD    | t(14;16)          | 5       | 5       | 1      |
| 25   | HRD    | t(4;14)& t(14;16) | 8       | 8       | 1      |
| 26   | HRD    | deleted           | 4       | 4       | 2      |
| 27   | NHRD   | t(14;16)          | 5       | 5       | 1      |
| 28   | HRD    | t(6;14)           | 4       | 4       | 2      |
| 29   | HRD    | normal            | 4       | 4       | 2      |
| 30   | HRD    | del(14q32)        | 4-6     | 4-6     | 2      |
| 31   | NHRD   | normal            | 3       | 3       | 1      |
| 32   | HRD    | t(4;14)           | 6       | 6       | 1      |
| 33   | NHRD   | normal            | 3       | 3       | 2      |
| 34   | HRD    | t(4;14)           | 3       | 3       | 1      |
| 35   | HRD    | t(4;14)           | 8       | 8       | 2      |
| 36   | NHRD   | t(4;14)           | 4       | 4       | 1      |
| 37   | HRD    | normal            | 3       | 3       | 2      |
| 38   | NHRD   | t(4;14)           | 3       | 3       | 1      |
| 39   | NHRD   | t(4;14)           | 8       | 8       | 1      |
| 40   | NHRD   | normal            | 3       | 3       | 2      |
| 41   | NHRD   | normal            | 4       | 4       | 2      |
| 42   | HRD    | normal            | 4       | 4       | 1      |
| 43   | NHRD   | normal            | 3       | 3       | 2      |
| 44   | NHRD   | t(14;16)          | 4       | 4       | 2      |
| 45   | HRD    | t(4;14)           | 4       | 4       | 2      |
| 46   | HRD    | normal            | 5       | 7       | 2      |
| 47   | HRD    | t(11;14)          | 4       | 4       | 2      |

|    |      |          |    |    |   |
|----|------|----------|----|----|---|
| 48 | HRD  | normal   | 7  | 6  | 2 |
| 49 | NHRD | t(4;14)  | 3  | 3  | 2 |
| 50 | NHRD | normal   | 3  | 3  | 1 |
| 51 | HRD  | normal   | 3  | 3  | 2 |
| 52 | NHRD | t(4;14)  | 3  | 3  | 2 |
| 53 | HRD  | t(4;14)  | 6  | 5  | 2 |
| 54 | NHRD | t(4;14)  | 6  | 6  | 2 |
| 55 | HRD  | normal   | 5  | 5  | 2 |
| 56 | HRD  | t(14;16) | 4  | 4  | 2 |
| 57 | NHRD | t(14;16) | 5  | 5  | 2 |
| 58 | HRD  | normal   | 3  | 3  | 2 |
| 59 | HRD  | t(4;14)  | 10 | 10 | 1 |
| 60 | NHRD | normal   | 4  | 5  | 2 |
| 61 | NHRD | t(4;14)  | 4  | 4  | 2 |
| 62 | HRD  | t(14;16) | 8  | 8  | 1 |
| 63 | HRD  | t(6;14)  | 4  | 4  | 1 |
| 64 | NHRD | t(4;14)  | 7  | 6  | 2 |
| 65 | NHRD | normal   | 3  | 3  | 2 |
| 66 | NHRD | t(4;14)  | 4  | 4  | 2 |
| 67 | NHRD | 5;14     | 3  | 3  | 2 |
| 68 | HRD  | t(4;14)  | 8  | 12 | 2 |
| 69 | NHRD | t(4;14)  | 3  | 3  | 1 |
| 70 | NHRD | t(4;14)  | 3  | 3  | 1 |
| 71 | HRD  | deleted  | 4  | 4  | 1 |
| 72 | HRD  | normal   | 2  | 2  | 2 |
| 73 | HRD  | normal   | 4  | 3  | 2 |
| 74 | NHRD | normal   | 5  | 5  | 2 |
| 75 | NHRD | t(4;14)  | 5  | 5  | 2 |
| 76 | HRD  | t(4;14)  | 3  | 4  | 2 |
| 77 | NHRD | t(4;14)  | 3  | 3  | 1 |
| 78 | NHRD | normal   | 4  | 4  | 2 |
| 79 | HRD  | t(14;16) | 4  | 4  | 2 |
| 80 | NHRD | t(14;20) | 3  | 3  | 2 |
| 81 | HRD  | normal   | 5  | 4  | 2 |
| 82 | HRD  | t(4;14)  | 7  | 7  | 2 |
| 83 | HRD  | t(14;16) | 5  | 5  | 1 |
| 84 | NHRD | t(4;14)  | 5  | 3  | 1 |
| 85 | HRD  | t(4;14)  | 5  | 5  | 2 |
| 86 | HRD  | t(4;14)  | 5  | 5  | 3 |
